# Supplementary material
Source: PubMed Central journal article supplement (PMC10592379)
Supplement: NIHMS1916942-supplement-4.pdf [file NIHMS1916942-supplement-4.pdf]

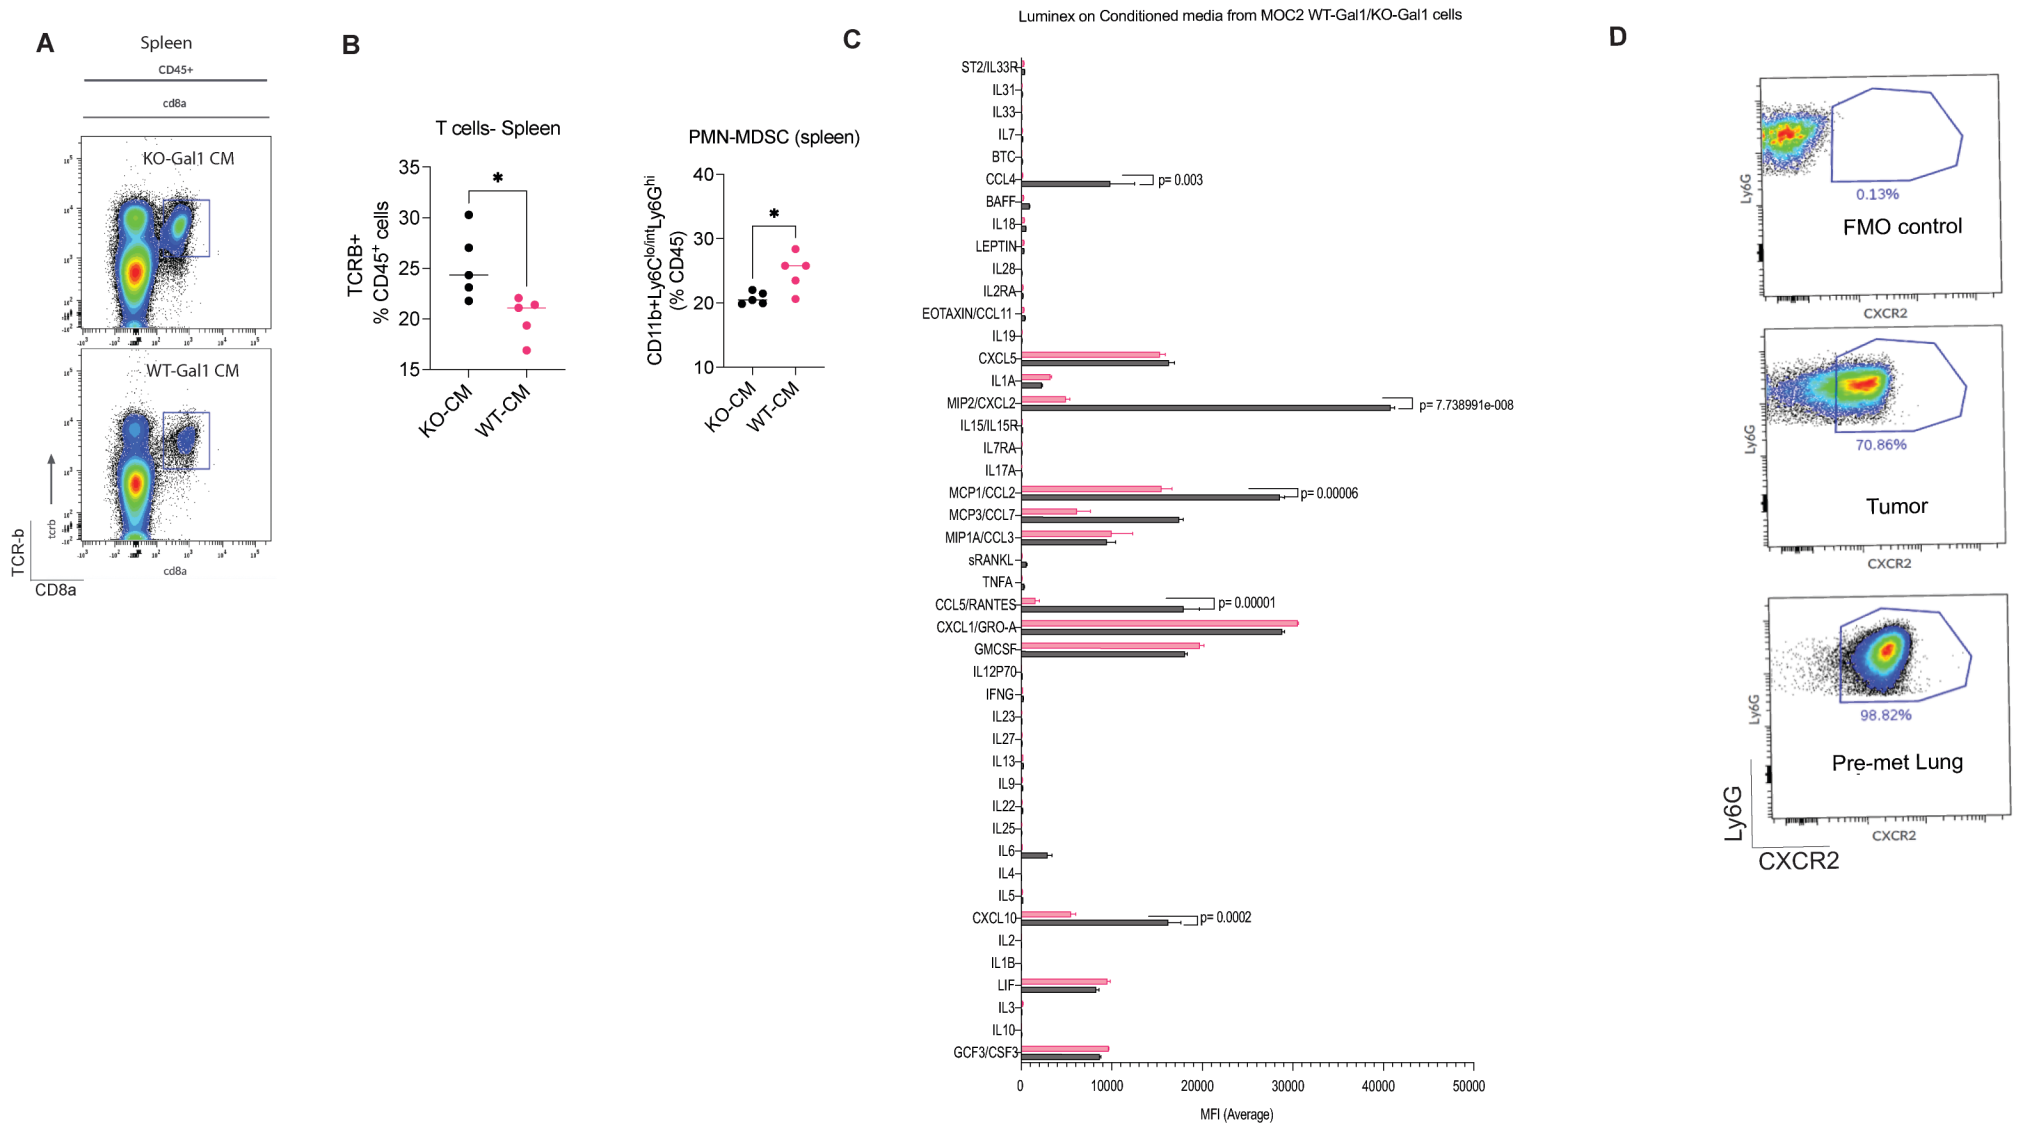

**Supplementary Figure 4: A.** Gating strategy for CD8<sup>+</sup> T cells in the spleen of mice treated with either MOC2 WT/KO-Gal1 CM. **B.** Quantitation of PMN-MDSCs and T cells in the spleen of mice bearing KO-Gal1 tumors injected with either WT- or KO-Gal1 CM for 3 weeks. **C.** Graph showing the 48-plex mouse cytokine Luminex assay results performed on the 10x concentrated condition media from MOC2 WT/KO-Gal1 tumor cells. The media was collected in 3 independent experiments and run as a single batch. **D.** Gating strategy for CXCR2 staining on PMN-MDSCs isolated from the tumor and pre-metastatic lungs.
