# Supplementary material
Source: PubMed Central journal article supplement (PMC10592379)

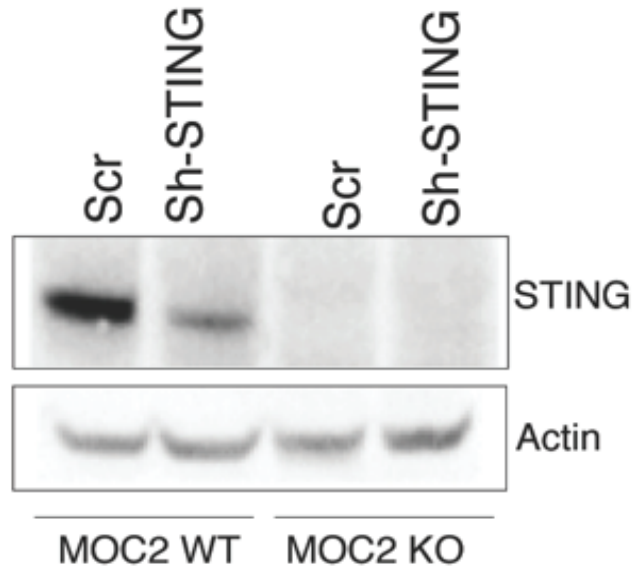

**Supplementary Figure 6:** Immunoblot showing knockdown of STING in MOC2 WT/KO cells.

Supplement: NIHMS1916942-supplement-6.pdf [file NIHMS1916942-supplement-6.pdf]
